# Supplementary material for: An Analytical Method for the Biomonitoring of Mercury in Bees and Beehive Products by Cold Vapor Atomic Fluorescence Spectrometry
Source: MDPI journal article supplement (doi:10.3390/molecules26164878), 2021-08-12
Supplement: s1 [file s1]

## Supplementary Material

# An Analytical Method for the Biomonitoring of Mercury in Bees and Beehive Products by Cold Vapor Atomic Fluorescence Spectrometry

Maria Luisa Astolfi<sup>1,\*</sup>, Marcelo Enrique Conti<sup>2</sup>, Martina Ristorini<sup>3</sup>, Maria Agostina Frezzini<sup>4</sup>, Marco Papi<sup>5</sup>, Lorenzo Massimi<sup>4</sup>, Silvia Canepari<sup>4</sup>

<sup>1</sup> Department of Chemistry, Sapienza University of Rome, Piazzale Aldo Moro 5, 00185 Rome, Italy;

<sup>2</sup> Department of Management, Sapienza University of Rome, Via del Castro Laurenziano 9, 00161 Rome, Italy; marcelo.conti@uniroma1.it (M.E.C.)

<sup>3</sup> Department of Bioscience and Territory, University of Molise, 86090 Pesche, Italy; m.ristorini@studenti.unimol.it (M.R.)

<sup>4</sup> Department of Environmental Biology, Sapienza University of Rome, Piazzale Aldo Moro 5, 00185 Rome, Italy; mariaagostina.frezzini@uniroma1.it (M.A.F.); l.massimi@uniroma1.it (L.M.); silvia.canepari@uniroma1.it (S.C.)

<sup>5</sup> Association of Beekeepers of Rome and Province, Via Albidona 20, 00118 Rome, Italy; buteo.betta@gmail.com (M.P.)

\* Correspondence: marialuisa.astolfi@uniroma1.it; Tel./Fax: +39-06-4991-3384

**Table S1** - Summary of the analytical characteristics of the proposed method and comparison with some previous methods published during the last decade (2010-2020).

| Reference  | Sample matrix                                                     | Sample preparation                                                                                                                                                                                                                                                                                           | Total sample digestion time           | Technique                                           | LOD                                                                                                                                               | LOQ                                                                                                    | Accuracy (R%)                                                                                                             | Precision (CV%) | Dynamic range (Log)                |
|------------|-------------------------------------------------------------------|--------------------------------------------------------------------------------------------------------------------------------------------------------------------------------------------------------------------------------------------------------------------------------------------------------------|---------------------------------------|-----------------------------------------------------|---------------------------------------------------------------------------------------------------------------------------------------------------|--------------------------------------------------------------------------------------------------------|---------------------------------------------------------------------------------------------------------------------------|-----------------|------------------------------------|
| This study | Bees, honey, beeswax, honeydew, pollen, propolis, and royal jelly | 0.02 g bee, pollen, propolis and royal jelly, 0.05 g beeswax and honey, or 0.1 g honeydew + 0.5 mL HCl, 0.2 mL HNO <sub>3</sub> and 0.1 mL H <sub>2</sub> O <sub>2</sub> were digested in a water bath (95 °C, 30 min) → volume completed to 5 mL deionized water.                                           | About 30 min for 120 samples or more. | CV-AFS                                              | 0.5 µg kg <sup>-1</sup> (for a sample mass of 0.1 g)–3 µg kg <sup>-1</sup> (for a sample mass of 0.02 g)                                          | 1 µg kg <sup>-1</sup> (for a sample mass of 0.1 g)–5 µg kg <sup>-1</sup> (for a sample mass of 0.02 g) | 86 (honey, 0.05 g)–117% (royal jelly, 0.02 g)                                                                             | <10%            | 1.9                                |
| [1]        | Bees, honey, and pollen                                           | 20–200 mg bee, 20–100 mg pollen or 50–200 mg honey + 0.2 mL HNO <sub>3</sub> followed by 0.1 mL H <sub>2</sub> O <sub>2</sub> in a digestion block (80 °C, 2 h total); samples were made up to a final volume of 6 mL.                                                                                       | 2h                                    | ICP-MS                                              | 14, and 4 µg kg <sup>-1</sup> for a honey sample mass of 0.05 and 0.2 g, respectively                                                             | -                                                                                                      | 96 (B)–129% (As) for trace elements and 91 (Pr)–112% (La) for rare earth elements                                         | <15%            | -                                  |
| [2]        | Bees, honey, pollen, and propolis                                 | For the bee samples drying at 100 °C for 48 h preceded microwave digestion. 1g honey, and pollen, 0.25 g propolis, or 0.1 g bees dried weight (at 100 °C for 48 h) + 5 mL HNO <sub>3</sub> and 2.5 mL H <sub>2</sub> O <sub>2</sub> were digested in the microwave oven (30 min) → volume completed to 25 mL | About 30 min                          | CV-AAS                                              | 50 µg kg <sup>-1</sup> for honey, 60 µg kg <sup>-1</sup> for pollen, 300 µg kg <sup>-1</sup> for propolis and 800 µg kg <sup>-1</sup> dw for bees | -                                                                                                      | 64 (propolis)–129% (honey)                                                                                                | <13%            | 0.6                                |
| [3]        | Honey                                                             | 0.1–2 g + 0.5 mL HNO <sub>3</sub> and 0.5 mL H <sub>2</sub> O <sub>2</sub> → the mixture allowed to stand for 12 h → heated to 100 °C in a metal block for 3 h → volume brought to 25 mL by adding 0.5 mol L <sup>-1</sup> HCl.                                                                              | 15 h                                  | Cloud point extraction (CPE), CV-ICP-OES or ICP-OES | 2 µg kg <sup>-1</sup> (CPE CV-ICP OES)–300 µg kg <sup>-1</sup> (ICP-OES)                                                                          | -                                                                                                      | R% close to 100% when up to 2.0 g of honey were subjected to sonication or up to 1.0 g of honey was decomposed with acid. | -               | 0.5 (ICP-OES)–1.5 (CPE CV-ICP OES) |

|      |                         |                                                                                                                                                                                                                  |        |                                              |                                                                   |                                                                 |                                      |                                 |                                            |
|------|-------------------------|------------------------------------------------------------------------------------------------------------------------------------------------------------------------------------------------------------------|--------|----------------------------------------------|-------------------------------------------------------------------|-----------------------------------------------------------------|--------------------------------------|---------------------------------|--------------------------------------------|
| [4]  | Honey                   | 0.5 g + 3 mL HNO <sub>3</sub> and 4 mL H <sub>2</sub> O <sub>2</sub> were digested in the microwave oven (1400 W, 30 min) → volume completed to 50 mL high-purity water                                          | 30 min | CV-AFS                                       | 0.15 µg kg <sup>-1</sup>                                          | -                                                               | 99%                                  | 1%                              | -                                          |
| [5]  | Honey                   | 0.5 g sample + 4 mL HNO <sub>3</sub> and 2 mL H <sub>2</sub> O <sub>2</sub> were digested in the microwave oven (1400 W, 30 min) → volume completed to 50 mL double deionised water                              | 30 min | AMA                                          | 0.1 µg kg <sup>-1</sup>                                           | -                                                               | 99%                                  | -                               | 3.7                                        |
| [6]  | Honey                   | For CV-AAS analysis: dilution in an acidic solution without heating. In the case of DMA, sample preparation was not necessary.                                                                                   | -      | DMA or CV-AAS                                | 1 or 30 µg kg <sup>-1</sup> using DMA or CV-AAS, respectively     | 2.5 or 60 µg kg <sup>-1</sup> using DMA or CV-AAS, respectively | CV-AAS: 98.7–102.4%; DMA: 95.6–99.1% | CV-AAS: 3.5–5.7%; DMA: 2.7–3.4% | 1.3 or 1.5 for DMA or CV-AAS, respectively |
| [7]  | Honey                   | 1 g sample + 12 mL HNO <sub>3</sub> and 3 mL H <sub>2</sub> O <sub>2</sub> were digested in the microwave oven                                                                                                   | -      | GF-AAS with a flow injection analysis system | -                                                                 | -                                                               | 91–113%                              | <10%                            | -                                          |
| [8]  | Bees, honey, and pollen | No sample pretreatment                                                                                                                                                                                           | -      | AMA                                          | 0.5 µg kg <sup>-1</sup>                                           | -                                                               | -                                    | -                               | -                                          |
| [9]  | Bees                    | bee were dried in a moisture analyzer to constant weight at 105 °C and ground → were digested in the microwave oven (45 min) → volume completed to 50 mL                                                         | 45 min | ICP-OES                                      | 1 mg kg <sup>-1</sup>                                             | -                                                               | -                                    | -                               | -                                          |
| [10] | Honey, and pollen       | 0.5 g honey, and 0.3 g pollen + 7 mL HNO <sub>3</sub> and 2 mL H <sub>2</sub> O <sub>2</sub> were digested in the microwave oven (from 180 to 240 °C, 40 min) → volume completed to 50 mL with deionized water.  | 40 min | ICP-MS                                       | -                                                                 | -                                                               | -                                    | -                               | -                                          |
| [11] | Beeswax, and honey      | 0.25 g beeswax + 5 mL HNO <sub>3</sub> and 1 mL H <sub>2</sub> O <sub>2</sub> or 2 g honey + 5 mL HNO <sub>3</sub> were pre-digested at room temperature for 30 min, then digested using microwave oven (20 min) | 50 min | High-Resolution ICP-OES                      | 0.1 or 0.3 µg kg <sup>-1</sup> for honey or beeswax, respectively | 0.4 or 9 µg kg <sup>-1</sup> for honey or beeswax, respectively | -                                    | -                               | -                                          |

|      |                     |                                                                                                                                                                                                                                                       |         |                                        |                        |                        |         |       |   |
|------|---------------------|-------------------------------------------------------------------------------------------------------------------------------------------------------------------------------------------------------------------------------------------------------|---------|----------------------------------------|------------------------|------------------------|---------|-------|---|
| [12] | Pollen              | 0.65-0.70 g + 10 mL HNO <sub>3</sub> and 3 mL H <sub>2</sub> O <sub>2</sub> were digested in the microwave oven → volume completed to 25 mL with a 5% HCl (v/v).                                                                                      | 120 min | Hydride Generator coupled with ICP-OES | 0.4 µg L <sup>-1</sup> | 2 µg L <sup>-1</sup>   | 79–123% | 6.4%  | - |
| [13] | Propolis            | ~0.1 g; no sample pre-treatment                                                                                                                                                                                                                       | -       | AMA-254                                | -                      | 2 µg kg <sup>-1</sup>  | 98%     | <5.1% | 2 |
| [14] | Honey, and propolis | 2 g of lyophilized samples + 5 mL HNO <sub>3</sub> were heated at 50 °C for 2 h and then at 110 °C for 18 h; in the next step 5 mL H <sub>2</sub> O <sub>2</sub> was added to the digested sample and was heated for 6 h → volume completed to 25 mL. | 26 h    | GF-AAS                                 | -                      | -                      | -       | -     | - |
| [15] | Bees                | 0.7 g of lyophilized sample + 7 ml HNO <sub>3</sub> and 1.5 mL H <sub>2</sub> O <sub>2</sub> were digested                                                                                                                                            | -       | DMA                                    | -                      | 10 µg kg <sup>-1</sup> | -       | -     | - |
| [16] | Bees                | ~0.5 g of dried sample + 7 ml HNO <sub>3</sub> and 2 mL H <sub>2</sub> O <sub>2</sub> were digested in the microwave oven → volume completed to 25 mL with deionized water.                                                                           | 30 min  | ICP-MS                                 | 10 µg kg <sup>-1</sup> | -                      | 94–108% | -     | - |

**Table S2.** Recovery and precision data for Hg in bees and beehive products (n = 3) by water bath digestion (95 °C, 30 min or 60 min).

| Matrix      | mass (g) | Intermediate level spike  |     |        |     | High level spike        |     |        |     |
|-------------|----------|---------------------------|-----|--------|-----|-------------------------|-----|--------|-----|
|             |          | (0.2 µg L <sup>-1</sup> ) |     |        |     | (1 µg L <sup>-1</sup> ) |     |        |     |
|             |          | 30 min                    |     | 60 min |     | 30 min                  |     | 60 min |     |
|             |          | R%                        | CV% | R%     | CV% | R%                      | CV% | R%     | CV% |
| Honey       | 0.05     | 116                       | 9.3 | 119    | 8.1 | 96                      | 7.8 | 91     | 0.6 |
|             | 0.1      | 104                       | 14  | 115    | 4.8 | 96                      | 3.0 | 92     | 4.0 |
|             | 0.2      | 79                        | 9.4 | 116    | 19  | 82                      | 3.7 | 54     | 28  |
|             | 1        | 48                        | 52  | 71     | 9.7 | 82                      | 8.9 | 18     | 2.8 |
| Honeydew    | 0.05     | 121                       | 6.5 | 113    | 4.1 | 101                     | 3.5 | 94     | 4.9 |
|             | 0.1      | 113                       | 10  | 113    | 2.5 | 91                      | 8.4 | 90     | 9.0 |
|             | 0.2      | 107                       | 21  | 114    | 2.8 | 82                      | 1.5 | 92     | 2.6 |
|             | 1        | 134                       | 9.2 | 91     | 11  | 81                      | 2.6 | 16     | 1.6 |
| Pollen      | 0.02     | 90                        | 3.7 | 110    | 5.9 | 95                      | 3.6 | 84     | 1.4 |
|             | 0.05     | 99                        | 6.2 | 110    | 6.4 | 93                      | 5.5 | 92     | 3.9 |
|             | 0.1      | 116                       | 5.7 | 113    | 4.6 | 91                      | 5.7 | 91     | 5.5 |
|             | 0.2      | 92                        | 2.3 | 108    | 8.0 | 91                      | 0.9 | 100    | 7.3 |
| Propolis    | 0.02     | 98                        | 8.6 | 109    | 9.3 | 91                      | 2.5 | 80     | 3.9 |
|             | 0.05     | 131                       | 4.0 | 153    | 21  | 80                      | 4.3 | 80     | 1.0 |
|             | 0.1      | 161                       | 15  | 145    | 19  | 55                      | 26  | 74     | 37  |
|             | 0.2      | 228                       | 9.2 | 144    | 56  | 131                     | 45  | 99     | 41  |
| Beeswax     | 0.02     | 97                        | 11  | 116    | 1.1 | 99                      | 5.7 | 95     | 3.6 |
|             | 0.05     | 111                       | 8.5 | 112    | 0.7 | 99                      | 2.0 | 93     | 6.1 |
|             | 0.1      | 101                       | 0.8 | 117    | 1.3 | 102                     | 9.2 | 82     | 4.2 |
|             | 0.2      | 110                       | 13  | 108    | 0.5 | 76                      | 39  | 89     | 5.0 |
| Royal Jelly | 0.02     | 108                       | 4.4 | 111    | 5.8 | 110                     | 0.9 | 95     | 2.0 |
|             | 0.05     | 110                       | 2.4 | 96     | 2.7 | 110                     | 0.8 | 86     | 3.0 |
|             | 0.1      | 100                       | 2.8 | 87     | 6.0 | 101                     | 3.2 | 89     | 7.7 |
|             | 0.2      | 102                       | 6.7 | 88     | 0.8 | 105                     | 2.2 | 88     | 4.4 |
| Bees        | 0.02     | 97                        | 4.5 | 92     | 9.9 | 91                      | 10  | 86     | 1.1 |
|             | 0.05     | 99                        | 4.1 | 105    | 8.9 | 97                      | 9.8 | 80     | 0.1 |
|             | 0.1      | 82                        | 8.7 | 100    | 9.0 | 93                      | 5.1 | 85     | 3.5 |
|             | 0.2      | 108                       | 7.8 | 99     | 0.7 | 98                      | 7.0 | 89     | 3.6 |

## References

1. Grainger, M.N.C.; Hewitt, N.; French, A.D. Optimised approach for small mass sample preparation and elemental analysis of bees and bee products by inductively coupled plasma mass spectrometry. *Talanta* **2020**, *214*, 120858. doi: 10.1016/j.talanta.2020.120858.
2. Maragou, N.C.; Pavlidis, G.; Karasali, H.; Hatjina, F. Cold vapor atomic absorption and microwave digestion for the determination of mercury in honey, pollen, propolis and bees of greek origin. *Global NEST J.* **2016**, *18*(4), 690–696.
3. Dos Santos Depoi, F.; Bentlin, F.R.S.; Pozebon, D. Methodology for Hg determination in honey using cloud point extraction and cold vapour-inductively coupled plasma optical emission spectrometry. *Anal. Methods* **2010**, *2*, 180–185. doi: 10.1039/b9ay00189a.
4. Ru, Q.-M.; Feng, Q.; He, J.-Z. Risk assessment of heavy metals in honey consumed in Zhejiang province, southeastern China. *Food Chem. Toxicol.* **2013**, *53*, 256–262. doi: 10.1016/j.fct.2012.12.015.
5. Bilandžić, N.; Gačić, M.; Đokić, M.; Sedak, M.; Šipušić, Đ. I.; Končurat, A.; Gajger, I.T. (2014). Major and trace elements levels in multifloral and unifloral honeys in Croatia. *J. Food Compos. Anal.* **2014**, *33*, 132–138. doi: 10.1016/j.jfca.2013.12.002.
6. Vieira, H.P.; Nascentes, C.C.; Windmüller, C.C. Development and comparison of two analytical methods to quantify the mercury content in honey. *J. Food Compos. Anal.* **2014**, *34*, 1–6. doi: 10.1016/j.jfca.2014.02.001.
7. Meli, M.A.; Desideri, D.; Roselli, C.; Benedetti, C.; Feduzi, L. Essential and toxic elements in honeys from a region of central Italy. *J. Toxicol. Env. Heal.* **2015**, *A 78*(10), 617–627. doi: 10.1080/15287394.2014.1004006.
8. Toth, T.; Kopernicka, M.; Sabo, R.; Kopernicka, T. The evaluation of mercury in honey bees and their products from eastern Slovakia. *Scientific Papers: Animal Science and Biotechnologies* **2016**, *49*, 257–260.
9. Džugan, M.; Wesołowska, M.; Zagula, G.; Kaczmarek, M.; Czernicka, M.; Puchalski, C. Honeybees (*Apis mellifera*) as a bio-logical barrier for contamination of honey by environmental toxic metals. *Environ. Monit. Assess.* **2018**, *190*, 101. doi: 10.1007/s10661-018-6474-0.
10. Jovetić, M.S.; Redžepović, A.S.; Nedić, N.M.; Vojt, D.; Đurđić, S.Z.; Brčeski, I.D.; Milojković-Opšćenica, D.M. Urban honey - the aspects of its safety. *Arh. Hig. Rada Toksikol.* **2018**, *69*(3), 264–274. doi: 10.2478/aiht-2018-69-3126.
11. Bommuraj, V.; Chen, Y.; Klein, H.; Sperling, R.; Barel, S.; Shimshoni J.A. Pesticide and trace element residues in honey and beeswax combs from Israel in association with human risk assessment and honey adulteration. *Food Chem.* **2019**, *299*, 125123. doi: 10.1016/j.foodchem.2019.125123.
12. Morgano, M.A.; Martins, M.C.T.; Rabonato, L.C.; Milani, R.F.; Yotsuyanagi, K.; Rodriguez-Amaya, D.B. Inorganic contaminants in bee pollen from southeastern Brazil. *J. Agr. Food Chem.* **2010**, *58*, 6876–6883. doi: 10.1021/jf100433p.
13. Bonvehí, J.S.; Bermejo, F.J.O. Element content of propolis collected from different areas of South Spain. *Environ. Monit. Assess.* **2013**, *185*, 6035–6047. doi: 10.1016/j.foodchem.2019.125123.
14. Matin, G.; Kargar, N.; Buyukisik, H.B. Bio-monitoring of cadmium, lead, arsenic and mercury in industrial districts of Izmir, Turkey by using honey bees, propolis and pine tree leaves. *Ecol. Eng.* **2016**, *90*, 331–335. doi: 10.1016/j.ecoleng.2016.01.035.
15. Perugini, M.; Manera, M.; Grotta, L.; Abete, M.C.; Tarasco, R.; Amorena, M. Heavy metal (Hg, Cr, Cd, and Pb) contamination in urban areas and wildlife reserves: honeybees as bioindicators. *Biol. Trace Elem. Res.* **2011**, *140*(2), 170–176. doi: 10.1007/s12011-010-8688-z.
16. Zaric, N.M.; Deljanin, I.; Ilijević, K.; Stanisavljević, L.; Ristić, M.; Gržetić, I. Assessment of spatial and temporal variations in trace element concentrations using honeybees (*Apis mellifera*) as bioindicators. *PeerJ* **2018**, *6*:e5197. doi: 10.7717/peerj.5197.
